# Supplementary material for: Healthcare utilization for diabetes and its associated factors: A survey study in Tehran, the capital of Iran
Source: Research Square preprint supplement (doi:10.21203/rs.3.rs-7488035/v1), 2025-09-22
Supplement: Supplementary file 1 [file 2a35204e6fff7629e2bb3f3a.docx]

**Questionnaire:** **Healthcare utilization for diabetes and its associated factors**

As you may know, the healthcare system aims to provide high-quality health and medical services to individuals suffering from diabetes and hypertension. A group of researchers from Shahid Beheshti University of Medical Sciences is conducting a study to "Examine the utilization of healthcare services in the provision of care for diabetes in Tehran."

In this study, "utilization" refers to individuals' use of a wide range of healthcare and medical services related to diabetes and hypertension, which are provided to adults in the national health system to maintain and improve their health. These services include care, screening, diagnosis, and treatment related to both diabetes and hypertension, which you have received over the past three months, six months, one year, or beyond from health, medical, and outpatient centers in the city.

We kindly request you to complete this questionnaire, which will take less than 5 minutes. No personally identifiable information is included in this questionnaire, and all data from this study will be used in aggregate to support research and help improve the healthcare service delivery system in Tehran.

**Demographic characteristics**

| Age | … year |
| --- | --- |
| Education | - Less than diploma - Diploma - Associate - Bachelor - Master and above |
| Marital status | - Single - Married - Separated/Spousal Deceased |
| Job status (you can select multiple options) | - Freelance - Retired - Unemployed - Housewife - Student - Worker - Nonmanagerial employee - Managerial employee - University professor |
| In general, how would you rate your health? | - Very bad - Bad - middle - Good - Very good |
| What was your position if the socioeconomic status was divided  into five categories where you?’ | - Very bad - Bad - middle - Good - Very good |
| Basic health insurance type | - Self-employed/Tamin ejtemaei - Health - Administrative/Tamin ejtemaei - Armed Forces Insurance - Uninsured |
| Supplementary insurance status | - No - Yes |
| Household | - single-person household - 2 people - 3 people - 4 people - 5 people - 6 people and above |
| **Diabetes status characteristics of the study participants** | |
| Based on your last test within the past year, have you had diabetes? | - No - Yes - I do not know |
| Which members of your family have diabetes? (you can select multiple options) | - Father - Mother - Sister - Brother - Wife - Child - None - I do not know |
| Do you have concerns that not seeking timely treatment for diabetes may lead to negative health consequences? | - Not at all - A little - Relatively - Very |
| From which source have you received the most information about diabetes? (you can select multiple options) | - Doctors or other healthcare professionals - Television or radio - Family or friends - Books, magazines, or brochures - Social media such as Telegram, Instagram, etc. |
| **Questions related to utilization** | |
| In the past two years, have you ever received diabetes-related services from one of the health service centers in Tehran? | - No - Yes |
| If yes, how long ago did you last receive service? | - Less than three months - 3-6 months - 6-12 months - More than 12 months |
| If yes, from which center was the last service received? | - primary healthcare center - Private specialist doctor's office - Private general practitioner's office - Government clinic or hospital - University of Medical Sciences - Social Security clinic or hospital - Islamic medicine practitioner, traditional medicine, Iranian medicine practitioner who was not a medical staff |
| If yes, under what conditions did you receive your last service? (you can select multiple options) | - Voluntarily and with the individual's knowledge - Advice, call or order from a doctor or health care provider - Concern about having symptoms - Recommendations from family, friends and neighbors - Other reasons |
| If yes, what do you think was the reason for receiving the last service? (you can select multiple options) | - Close distance and easy access to the service center - Low cost or no financial issues to get the service - Good response and behavior of service providers - Convenient working hours for visiting centers - High level of centers - doctors/healthcare providers in terms of science, literacy, training methods, and medical advice - The service is safe for me. - Other reasons |
| If no, what do you think was the reason for not receiving the service? (you can select multiple options | - I had no symptoms or problems. - Long distance from the service center - Financial problems and lack of service fees - Inappropriate behavior of the service provider - Working hours coincide with the center's activities. - Time-consuming to receive services - The service did not suit my needs. - Lack of favorable insurance status - The low level of centers in terms of science, literacy, and service recommendations - Self-treatment with modern and new medicine drugs - Self-treatment with existing medicines Islamic medicine - Iranian medicine - The service is not safe for me. |
